# Supplementary material for: MiR-144 regulates cognitive dysfunction via NLRP3 inflammasome and FoxO1/AdipoR pathway in T2DM mice
Source: Research Square preprint supplement (doi:10.21203/rs.3.rs-8592557/v1), 2026-02-06
Supplement: Supplementary file 1 [file be02d97a7de2aa327fa60987.docx]

**Supplement for Zhao J, et al. MiR-144 regulates cognitive impairment via NLRP3 inflammasome and FoxO1/AdipoR pathway in T2DM mice**

**Supplemental Figures**

**
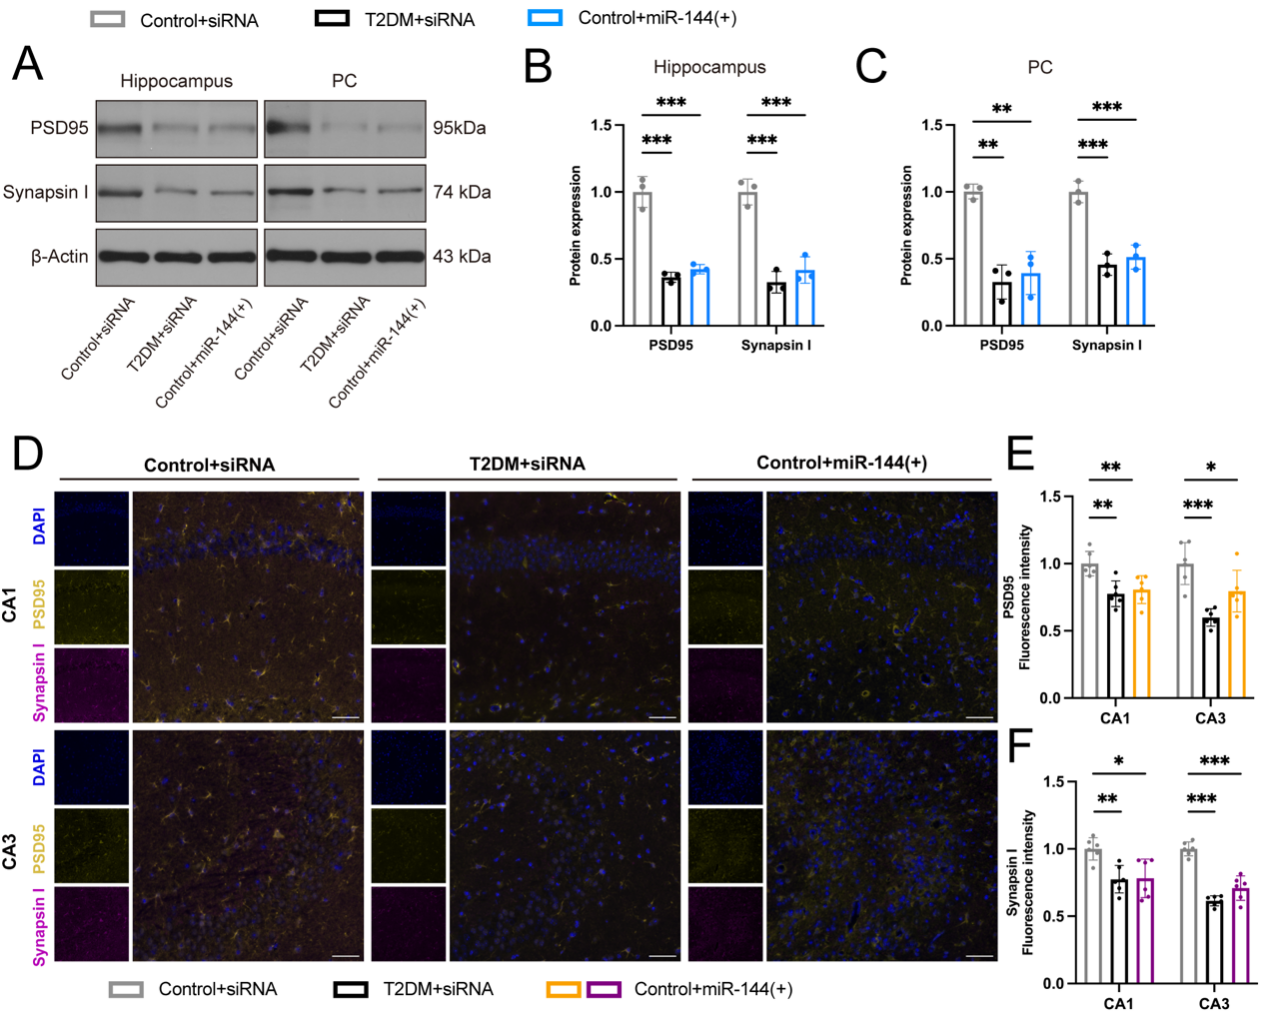
**

**Figure S1** **Overexpression of miR-144 and T2DM inhibit the expression of synaptic proteins.**

**A** Representative western blotting of synaptic proteins in the hippocampus and PC.

**B-C** The relative expression level of PSD95 and Synapsin I in the hippocampus and PC.

**D** Representative immunofluorescence images of synaptic proteins in the hippocampus (Scale bar =50μm).

**E-F** Relative fluorescence intensity of PSD95 and Synapsin I in the CA1 and CA3 of the hippocampus.

(n=3. **P*<0.05, ***P*<0.01, ****P*<0.001 vs. Control+siRNA)


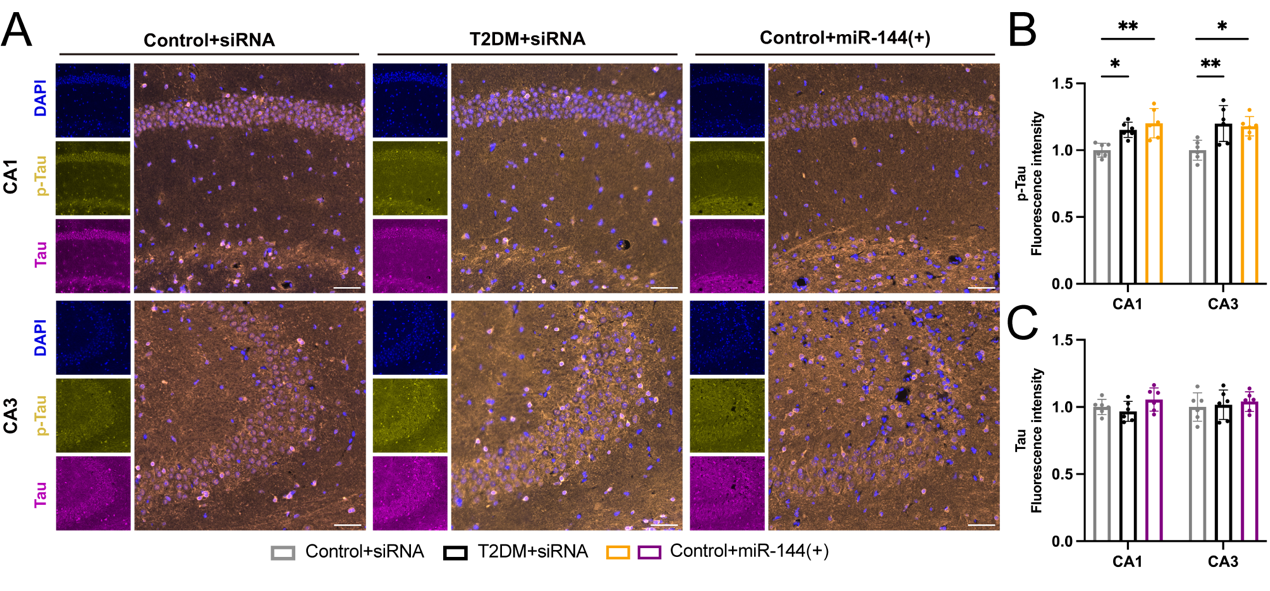


**Figure S2 Hyperphosphorylation of Tau in miR-144(+) and T2DM mice.**

**A** Representative immunofluorescence images of Tau and p-Tau in the hippocampus.

**B-C** Relative fluorescence intensity of Tau and p-Tau in the CA1 and CA3 of the hippocampus.

(Scale bar =50μm, n=3. **P*<0.05, ***P*<0.01, ****P*<0.001 vs. Control+siRNA)


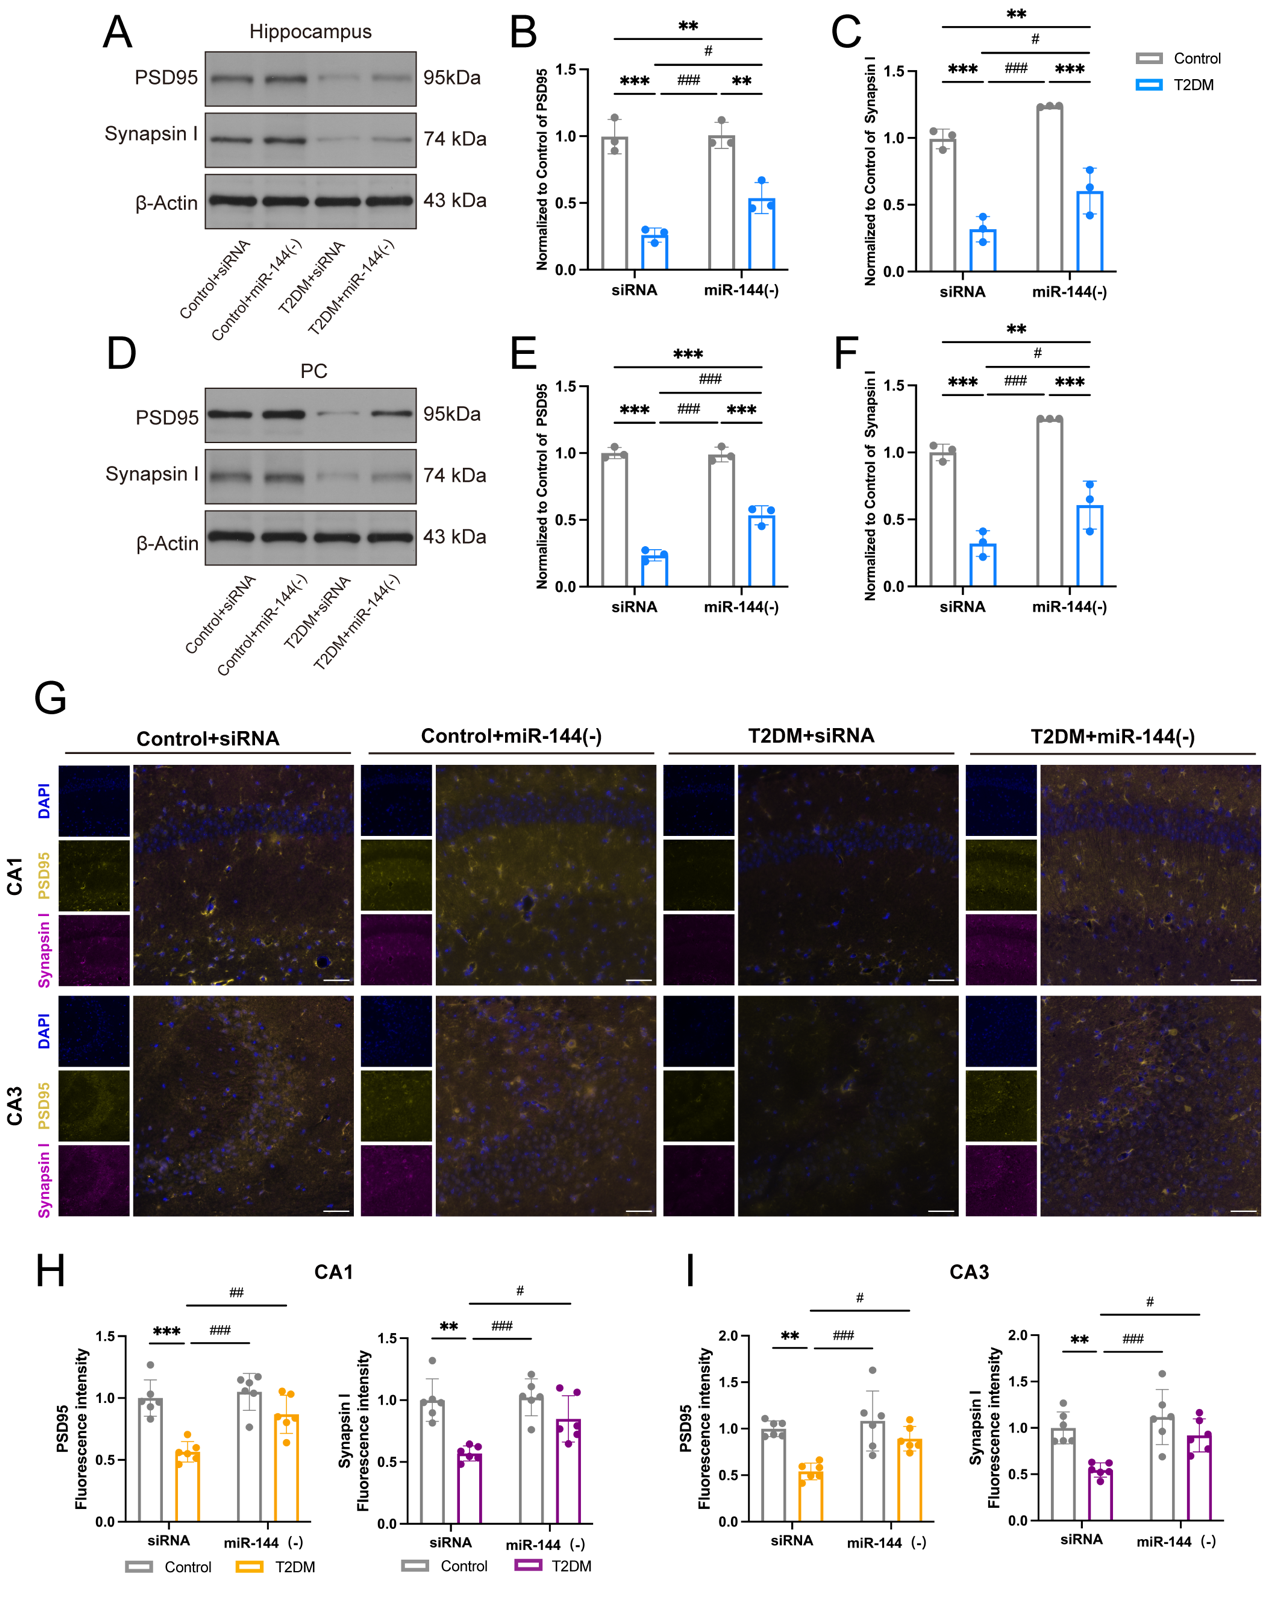


**Figure S3** **Knockdown of miR-144 improves synaptic proteins expression in T2DM mice.**

**A, D** Representative western blotting of synaptic proteins in the hippocampus and PC.

**B-C** The relative expression level of PSD95 and Synapsin I in the hippocampus.

**E-F** The relative expression level of PSD95 and Synapsin I in the PC.

**G** Representative immunofluorescence images of synaptic proteins in the hippocampus (Scale bar =50μm).

**H, I** Relative fluorescence intensity of PSD95 and SynapsinI in each group of CA1 and CA3.

(n=3. **P*<0.05, ***P*<0.01, ****P*<0.001 vs. Control+siRNA; #*P*<0.05, ##*P*<0.01, ###*P*<0.001 vs. T2DM+siRNA)


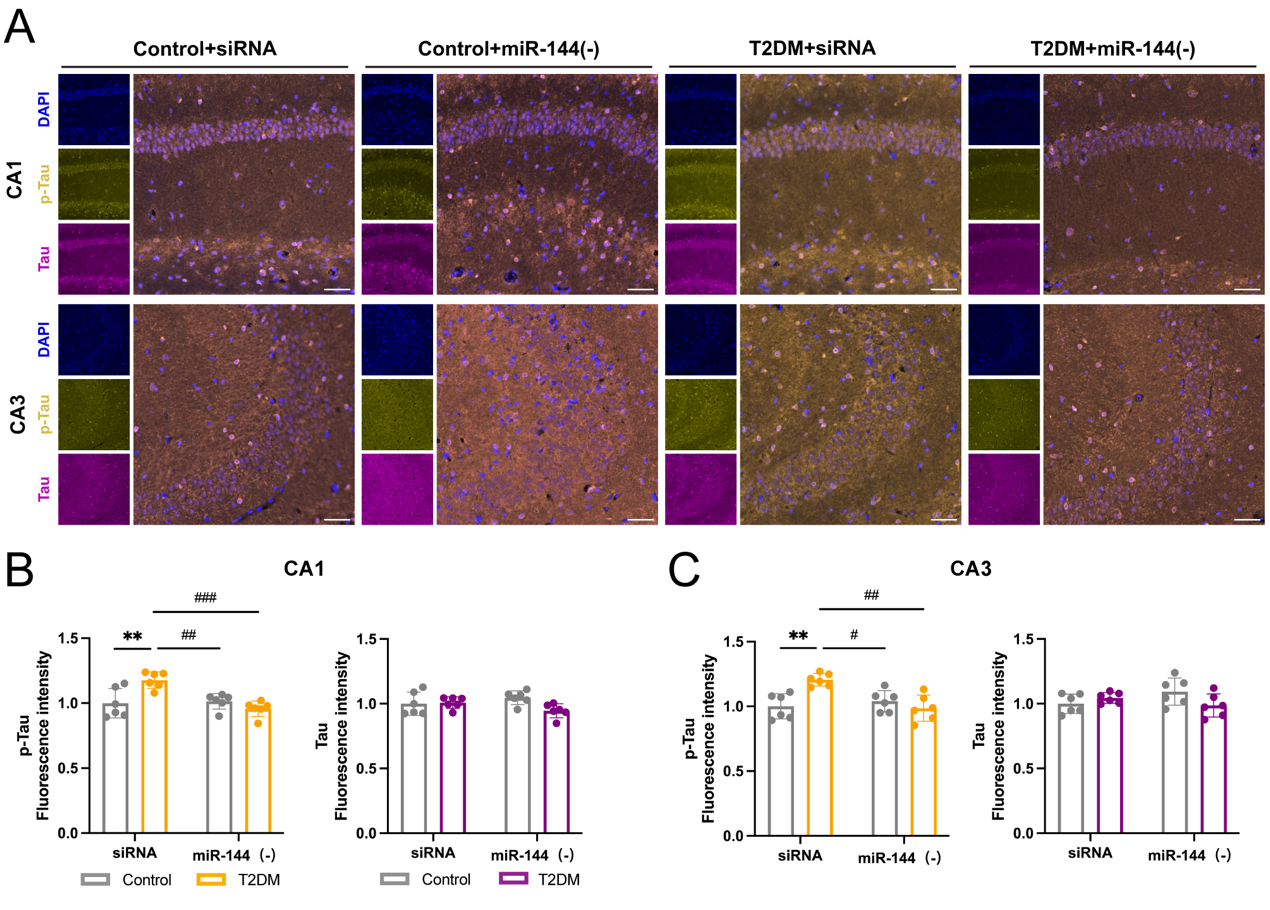


**Figure S4 Knockdown of miR-144 ameliorates Tau hyperphosphorylation in T2DM mice.**

**A** Representative immunofluorescence images of Tau and p-Tau in the hippocampus.

**B-C** Relative fluorescence intensity of Tau and p-Tau in each group of CA1 and CA3.

(Scale bar =50μm. n=3. **P*<0.05, ***P*<0.01, ****P*<0.001 vs. Control+siRNA; #*P*<0.05, ##*P*<0.01, ###*P*<0.001 vs. T2DM+siRNA)
